# Supplementary material for: Redefining the Foreign Antigen and Self-Driven Memory CD4+ T-Cell Compartments via Transcriptomic, Phenotypic, and Functional Analyses
Source: PubMed Central journal article supplement (PMC9190281; doi:10.3389/fimmu.2022.870542), 2022-05-30
Supplement: DataSheet_1.pdf [file DataSheet_1.pdf]

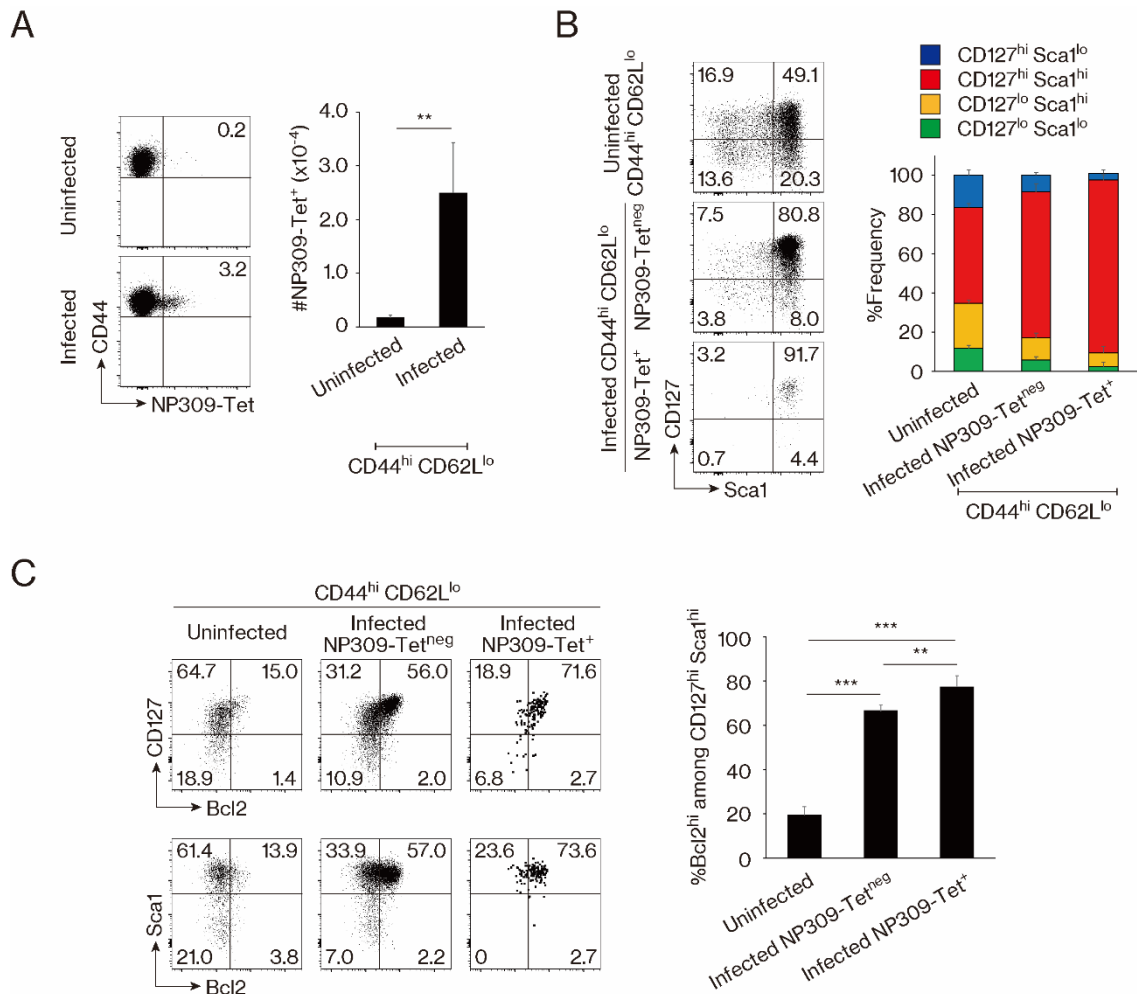

**Figure S1. NP309-specific memory CD4<sup>+</sup> T lymphocytes have a CD127<sup>hi</sup> Sca1<sup>hi</sup> Bcl2<sup>hi</sup> phenotype.** (A) The representative dot plots show NP309 tetramer binding in CD44<sup>hi</sup> CD62L<sup>lo</sup> CD4<sup>+</sup> T lymphocytes from uninfected versus LCMV-infected mice while the bar graph indicates the number (mean  $\pm$  S.D.) of NP309-tetramer<sup>+</sup> cells in each group (n=5 mice). (B) Dot plots showing CD127 and Sca1 expression in the indicated cell populations as well as a bar graph depicting the frequency (mean  $\pm$  S.D.) of each subpopulation among the same populations are displayed (n=5 mice). (C) The representative dot plots show CD127, Sca1, and Bcl2 expression in the indicated cell populations from uninfected and LCMV-infected animals while the bar graph indicates the frequency (mean  $\pm$  S.D.) of Bcl2<sup>hi</sup> fraction among CD127<sup>hi</sup> Sca1<sup>hi</sup> cells from the same populations (n=3-4 mice). Data are representative of 2 independent experiments performed. \*\*  $p < 0.01$ , \*\*\*  $p < 0.001$ .

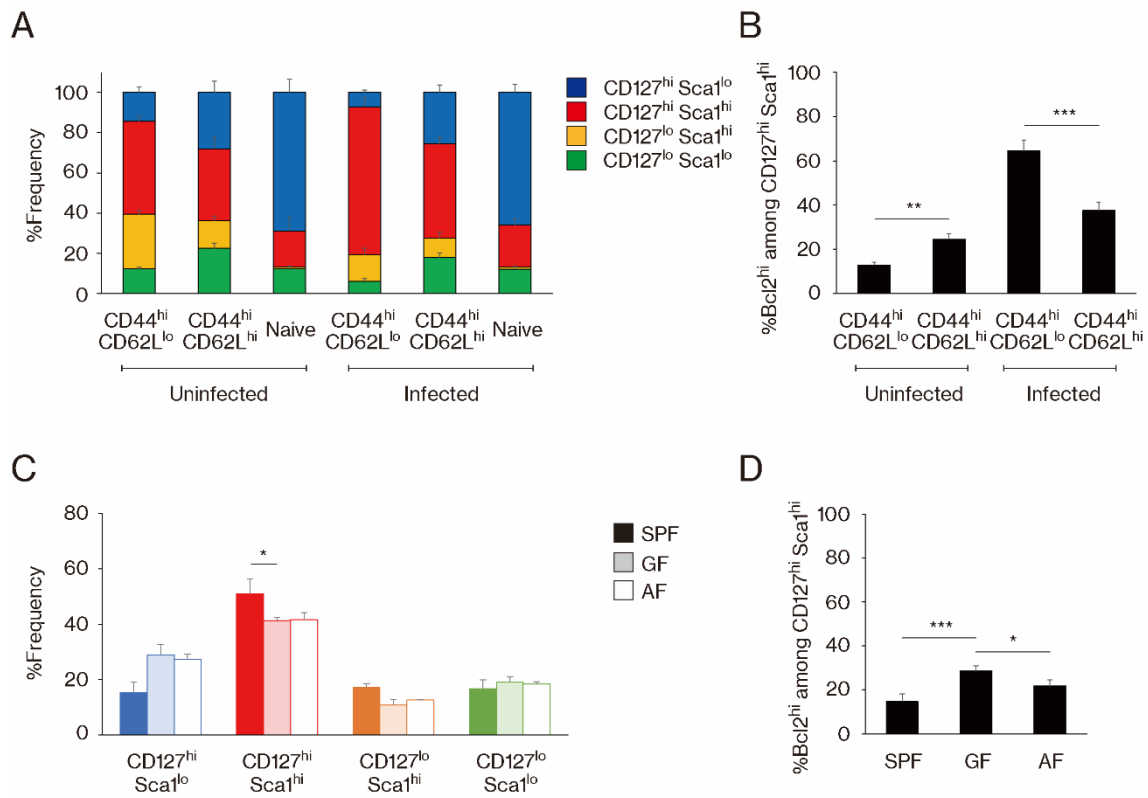

**Figure S2. CD44<sup>hi</sup> CD62L<sup>hi</sup> CD4<sup>+</sup> T lymphocytes in uninfected SPF, GF, AF, and LCMV-infected mice. (A)** The bar graph shows the frequency (mean  $\pm$  S.D.) of CD127<sup>hi</sup> Sca1<sup>lo</sup>, CD127<sup>hi</sup> Sca1<sup>hi</sup>, CD127<sup>lo</sup> Sca1<sup>hi</sup>, and CD127<sup>lo</sup> Sca1<sup>lo</sup> cells among the indicated CD4<sup>+</sup> T cell populations from uninfected SPF and infected mice (n=5 mice). **(B)** The bar graph indicates the Bcl2<sup>hi</sup> fraction (mean  $\pm$  S.D.) among CD127<sup>hi</sup> Sca1<sup>hi</sup> cells from CD44<sup>hi</sup> CD62L<sup>lo</sup> and CD44<sup>hi</sup> CD62L<sup>hi</sup> CD4<sup>+</sup> T cells in uninfected and LCMV-infected mice (n=3-4 mice). **(C)** The frequency (mean  $\pm$  S.D.) of the indicated subsets among total CD44<sup>hi</sup> CD62L<sup>hi</sup> CD4<sup>+</sup> T lymphocytes from SPF, GF, and AF mice (n=3-4 mice). **(D)** The Bcl2<sup>hi</sup> fraction (mean  $\pm$  S.D.) among CD127<sup>hi</sup> Sca1<sup>hi</sup> CD44<sup>hi</sup> CD62L<sup>hi</sup> CD4<sup>+</sup> T cells from SPF, GF, and AF animals (n=3-4 mice). Data are representative of 2 independent experiments performed. \*  $p < 0.05$ , \*\*  $p < 0.01$ , \*\*\*  $p < 0.001$ .

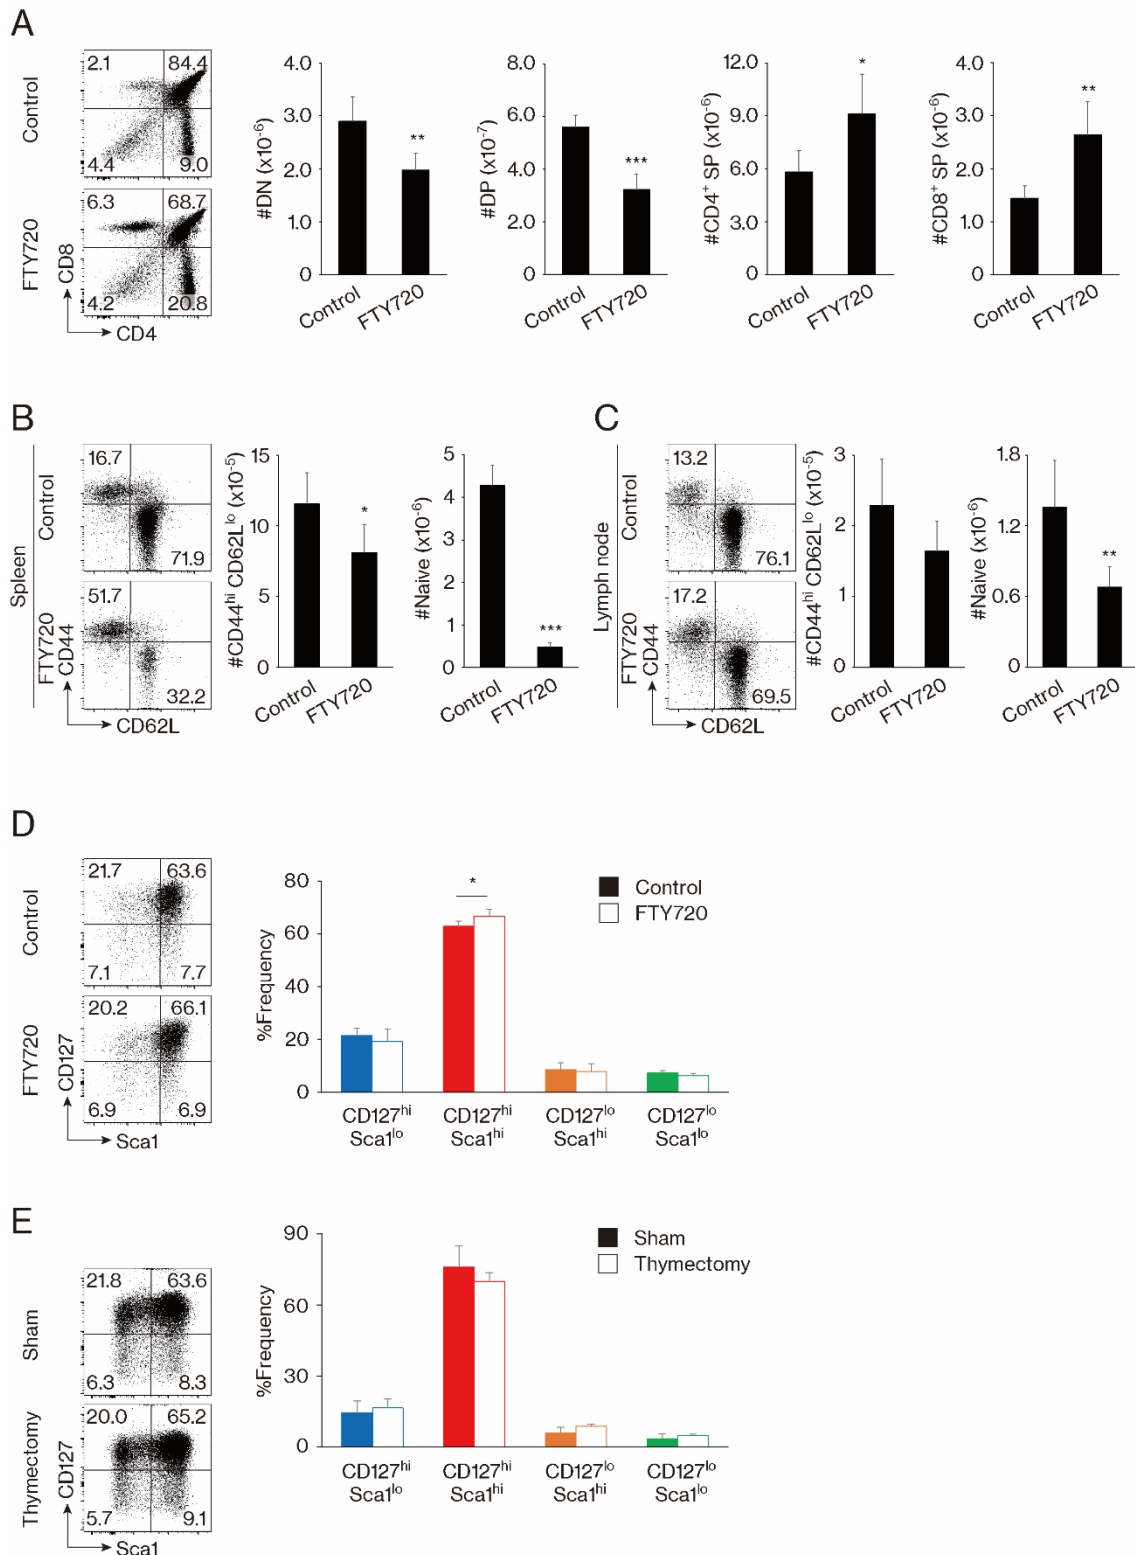

**Figure S3. The four MP subpopulations in the periphery are maintained in the absence of thymic input. (A – D) Mice received FTY720 or control PBS and were**

analyzed 2 weeks later. (A) Dot plots showing CD4 and CD8 expression in thymocytes from each group together with bar graphs indicating the number (mean  $\pm$  S.D.) of double-negative (DN), double-positive (DP), and CD4<sup>+</sup> and CD8<sup>+</sup> single-positive (SP) thymocytes (n=5 mice). (B, C) Dot plots displaying CD44 and CD62L expression in CD4<sup>+</sup> T lymphocytes in the (B) spleen and (C) lymph nodes as well as bar graphs depicting the number (mean  $\pm$  S.D.) of MP and naïve cells from each group (n=5 mice). (D) Dot plots showing CD127 and Sca1 levels in splenic MP CD4<sup>+</sup> T lymphocytes from each group and a bar graph indicating the frequency (mean  $\pm$  S.D.) of MP subpopulations among the total MP population (n=5 mice). Data are representative of 2 independent experiments. (E) Mice underwent adult-thymectomy or sham-operation and were analyzed for their MP T lymphocytes 2 weeks later. The representative dot plots display CD127 and Sca1 expression in MP cells from each group while the bar graph indicates the frequency (mean  $\pm$  S.D.) of MP subpopulations among total MP cells (n=4 mice). Data are pooled from 3 independent experiments performed. \*  $p < 0.05$ , \*\*  $p < 0.01$ , \*\*\*  $p < 0.001$ .

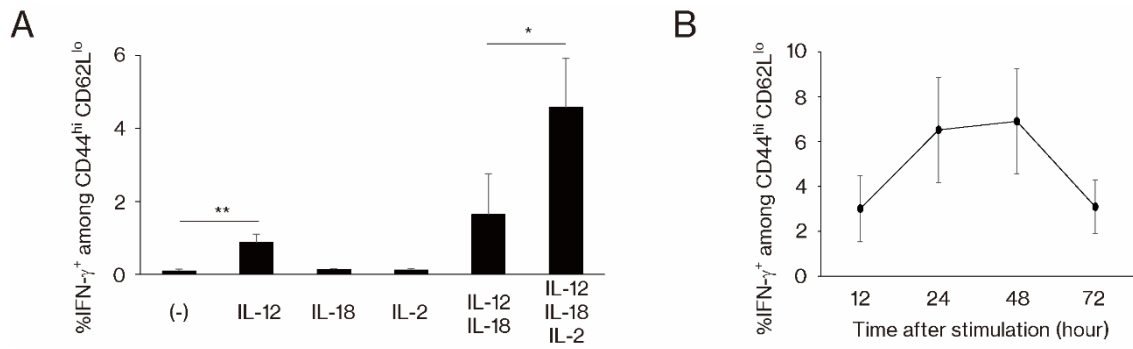

**Figure S4. MP cells respond to IL-12, IL-18, and IL-2 and produce IFN- $\gamma$ .** Total splenocytes were cultured **(A)** under the indicated conditions for 24 hours or **(B)** in the presence of IL-12, IL-18, and IL-2 for the indicated period. The graphs indicate the frequency (mean  $\pm$  S.D.) of IFN- $\gamma^+$  cells among MP CD4<sup>+</sup> T lymphocytes (n=4 mice). Data are representative of 2 independent experiments. \*  $p < 0.05$ , \*\*  $p < 0.01$ .

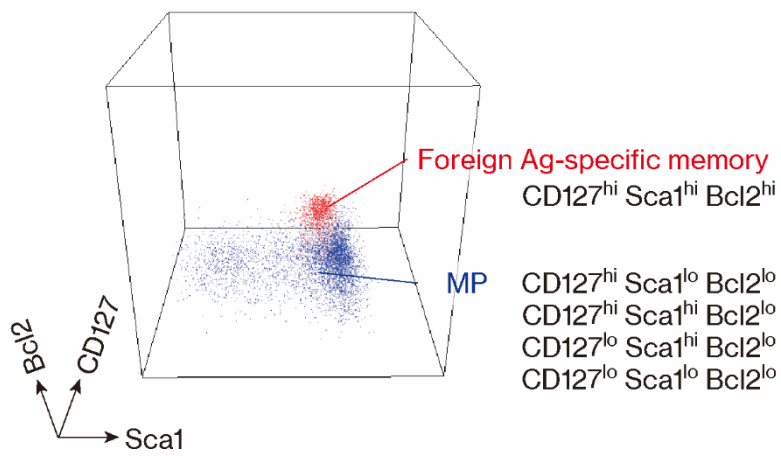

**Figure S5. Foreign Ag-specific and MP  $CD4^+$  T cells represent phenotypically distinct populations.** Foreign Ag-specific memory cells are  $CD127^{hi} Sca1^{hi} Bcl2^{hi}$  (red) while MP cells are  $CD127^{lo-hi} Sca1^{lo-hi} Bcl2^{lo}$  (blue). Among the latter,  $CD127^{hi} Sca1^{hi}$  cells represent the most mature MP subset with the Th1-type inflammatory potential.

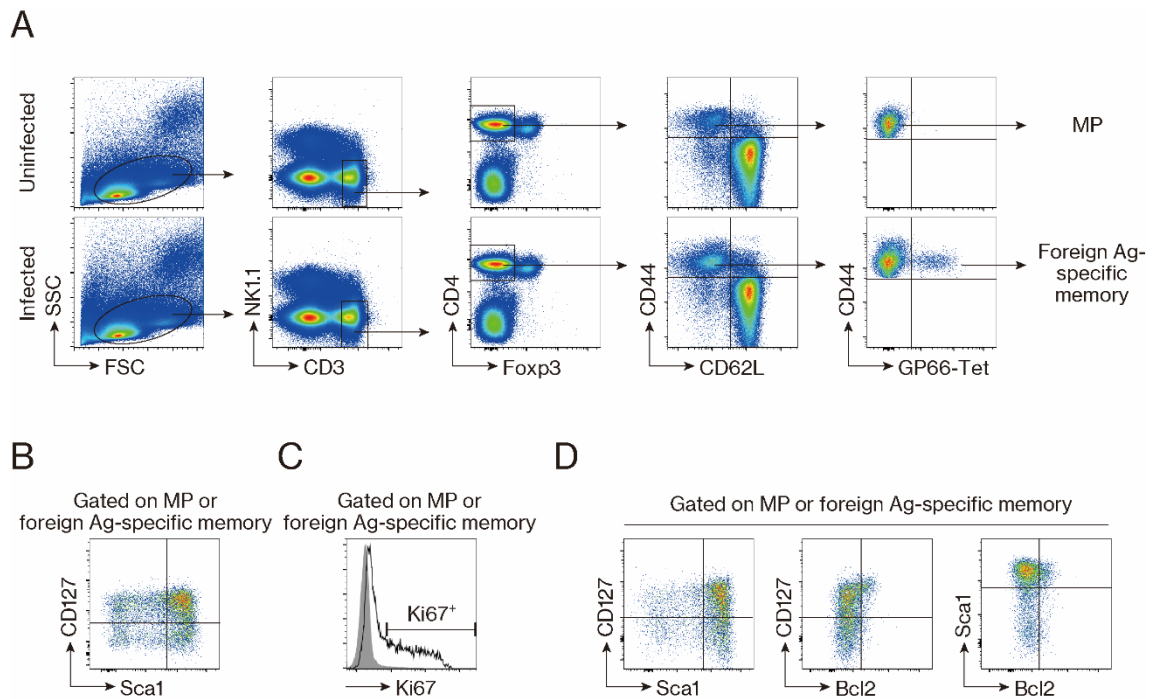

**Figure S6. Gating strategy for flow cytometric analyses.** (A) To detect MP and foreign Ag-specific memory  $CD4^+$  T cells, total singlet cells were gated for  $CD3^+$   $NK1.1^{neg}$   $CD4^+$   $Foxp3^{neg}$   $CD44^{hi}$   $CD62L^{lo}$  population. MP and foreign Ag-specific memory cells were then defined as tetramer<sup>neg</sup> cells from uninfected mice and tetramer<sup>+</sup> cells from LCMV-infected mice, respectively. (B) To analyze MP subsets, CD127 and Sca1 expression levels were measured in MP or foreign Ag-specific memory cells determined in (A). (C) For examination of proliferation status, Ki67 levels were measured in MP subsets as well as foreign Ag-specific memory cells using naïve cell population as a reference. (D) For detection of Bcl2, CD127, Sca1, and Bcl2 levels were simultaneously analyzed in MP and foreign Ag-specific memory cells. Bcl2<sup>hi</sup> fraction was determined as the frequency of Bcl2<sup>hi</sup> cells among CD127<sup>hi</sup> Sca1<sup>hi</sup> MP or foreign Ag-specific memory T lymphocyte populations.

| <b>Cell cycle<br/>(positive regulators)</b> | <b>Cell cycle<br/>(negative regulators)</b> | <b>Anti-apoptosis</b> |
|---------------------------------------------|---------------------------------------------|-----------------------|
| <i>Aurka</i>                                | <i>Cdkn1a</i>                               | <i>Bcl2</i>           |
| <i>Aurkb</i>                                | <i>Cdkn1b</i>                               | <i>Bcl2a1</i>         |
| <i>Ccna2</i>                                | <i>Cdkn2a</i>                               | <i>Bcl2l1</i>         |
| <i>Ccnb1</i>                                | <i>Cdkn2b</i>                               | <i>Bcl2l2</i>         |
| <i>Ccnb2</i>                                | <i>Cdkn2c</i>                               | <i>Bcl2l10</i>        |
| <i>Ccnd1</i>                                | <i>Cdkn2d</i>                               | <i>Mcl1</i>           |
| <i>Ccnd2</i>                                | <i>Chek1</i>                                | <i>Naip1</i>          |
| <i>Ccnd3</i>                                | <i>Chek2</i>                                | <i>Naip2</i>          |
| <i>Ccne1</i>                                | <i>E2f4</i>                                 | <i>Naip3</i>          |
| <i>Cdc25a</i>                               | <i>E2f5</i>                                 | <i>Naip4</i>          |
| <i>Cdc25b</i>                               | <i>E2f6</i>                                 | <i>Naip5</i>          |
| <i>Cdc25c</i>                               | <i>E2f7</i>                                 | <i>Naip6</i>          |
| <i>Cdk1</i>                                 | <i>E2f8</i>                                 | <i>Naip7</i>          |
| <i>Cdk2</i>                                 | <i>Rb1</i>                                  |                       |
| <i>Cdk4</i>                                 | <i>Trp53</i>                                |                       |
| <i>Cdk6</i>                                 | <i>Wee1</i>                                 |                       |
| <i>E2f1</i>                                 |                                             |                       |
| <i>E2f2</i>                                 |                                             |                       |
| <i>E2f3</i>                                 |                                             |                       |
| <i>Mdm2</i>                                 |                                             |                       |
| <i>Plk1</i>                                 |                                             |                       |
| <i>Plk3</i>                                 |                                             |                       |
| <i>Plk4</i>                                 |                                             |                       |
| <i>Tfdp1</i>                                |                                             |                       |
| <i>Tfdp2</i>                                |                                             |                       |

**Table S1. T cell gene signatures.**
